# Supplementary material for: CSF proteomics identifies early changes in autosomal dominant Alzheimer’s disease
Source: PubMed Central journal article supplement — Cell. Author manuscript; Available in PMC 2024 Nov 3. (PMC11531390; doi:10.1016/j.cell.2024.08.049), 2024-09-26
Supplement: NIHMS2024325-supplement-13.pdf [file NIHMS2024325-supplement-13.pdf]

**Table S6. Comparison between CSF results and brain results from Sung et al (Science Trans. Med, 2023), related to STAR Methods**

| Analyte   | EntrezGeneSymbol | CSF            |            |          | Brain          |                 |              |                 |                |                 |              |                 |
|-----------|------------------|----------------|------------|----------|----------------|-----------------|--------------|-----------------|----------------|-----------------|--------------|-----------------|
|           |                  | Trajectory.EYO | slope_diff | p-value  | ADAD vs CO Est | ADAD vs CO P    | DeathCDR Est | DeathCDR P      | BraakAbeta Est | BraakAbeta P    | BraakTau Est | BraakTau P      |
| X13118.5  | SMOC1            | -28.246        | 0.003      | 5.07E-11 | 0.131          | <b>2.34E-06</b> | 0.012        | <b>1.34E-06</b> | 0.036          | <b>1.74E-11</b> | 0.014        | <b>1.23E-16</b> |
| X13113.7  | SPP1             | -13.461        | 0.004      | 3.77E-08 | 0.089          | <b>7.34E-04</b> | 0.009        | <b>1.19E-06</b> | 0.010          | <b>1.91E-02</b> | 0.005        | <b>6.26E-04</b> |
| X14157.21 | YWHAE            | -12.915        | 0.005      | 3.62E-15 | 0.072          | <b>3.86E-02</b> | 0.015        | <b>2.23E-05</b> | 0.015          | 7.36E-02        | 0.006        | <b>1.95E-02</b> |
| X9169.14  | SUMO3            | -12.562        | 0.003      | 7.13E-09 | 0.070          | <b>5.33E-03</b> | 0.011        | <b>9.13E-06</b> | 0.012          | <b>3.09E-02</b> | 0.004        | <b>3.77E-02</b> |
| X3405.6   | UFC1             | -6.608         | 0.002      | 1.23E-06 | 0.064          | <b>2.51E-02</b> | 0.006        | <b>6.99E-03</b> | 0.005          | 3.84E-01        | 0.005        | <b>7.79E-03</b> |
| X3351.1   | CAMK2B           | -10.144        | 0.002      | 5.47E-09 | -0.028         | <b>1.29E-02</b> | -0.002       | 2.44E-01        | -0.005         | 1.88E-01        | -0.004       | <b>7.79E-03</b> |
| X3432.21  | EPHA3            | -12.992        | 0.001      | 9.61E-06 | -0.146         | <b>1.31E-02</b> | -0.008       | 1.33E-01        | -0.028         | <b>2.41E-02</b> | -0.010       | <b>1.43E-02</b> |
| X5858.6   | YWHAZ            | -11.813        | 0.006      | 1.56E-17 | -0.163         | <b>5.31E-05</b> | -0.014       | <b>3.40E-03</b> | -0.023         | <b>3.39E-02</b> | -0.011       | <b>1.07E-03</b> |
| X4230.1   | EIF4G2           | -10.491        | 0.002      | 3.24E-09 | -0.231         | <b>3.54E-03</b> | -0.020       | <b>3.42E-02</b> | -0.043         | <b>3.28E-02</b> | -0.013       | <b>4.82E-02</b> |
| X4272.46  | GPI              | -9.087         | 0.006      | 2.39E-13 | -0.236         | <b>3.02E-06</b> | -0.014       | <b>3.39E-03</b> | -0.025         | <b>1.56E-02</b> | -0.011       | <b>9.88E-04</b> |
| X4179.57  | YWHAG            | -14.665        | 0.009      | 6.04E-23 | -0.401         | <b>1.60E-03</b> | -0.048       | <b>1.13E-03</b> | -0.091         | <b>5.72E-03</b> | -0.035       | <b>7.29E-04</b> |
